# Supplementary material for: Design and synthesis of dichromeno[2,3-b;3′,2′-e]pyridine-12,14-dione to evaluate its optical properties
Source: Royal Society of Chemistry journal article supplement (doi:10.1039/c6nj04057h), 2017-01-01
Supplement: c6nj04057h1.pdf [file c6nj04057h1.pdf]

## Supporting Information

### Design and synthesis of dichromeno[2,3-*b*; 3',2'-*e*]pyridine-12,14-dione to evaluate its optical properties

Pritam Biswas, Debabrata Jana and Chandrakanta Bandyopadhyay\*

*Department of Chemistry, R. K. Mission Vivekananda Centenary College, Rahara,*

*Kolkata - 700118, West Bengal, India*

*e-mail: [kantachandra@rediffmail.com](mailto:kantachandra@rediffmail.com)*

#### Table of contents

| Serial number | Contents                                                                                                             | Page numbers |
|---------------|----------------------------------------------------------------------------------------------------------------------|--------------|
| 1.            | Materials and methods                                                                                                | 2            |
| 2.            | General procedure for the synthesis of dichromeno[2,3- <i>b</i> ; 3',2'- <i>e</i> ]pyridine-12,14-dione ( <b>6</b> ) | 2            |
| 3.            | Analytical data of Compounds <b>6a-6f</b>                                                                            | 2-4          |
| 4.            | Copies of <sup>1</sup> H NMR and <sup>13</sup> C NMR spectra of compound <b>6a-6f</b>                                | 4-13         |
| 5.            | Excitation spectra of compounds <b>6a</b> , <b>6c</b> , <b>6d</b> and <b>6f</b>                                      | 14           |
| 6.            | Absorption spectrum of compound <b>6f</b> in three different solvents                                                | 14           |
| 7.            | Emission spectra of compound <b>6f</b> in three different solvents                                                   | 15           |

## 1. Materials and Methods

The recorded mps are uncorrected. IR spectra were recorded in KBr on a Shimadzu FTIR spectrophotometer, IR Affinity-1,  $^1\text{H}$  NMR /  $^{13}\text{C}$  NMR spectra on a Bruker 300 MHz / 75 MHz or 400 MHz / 100 MHz spectrometer in  $\text{CDCl}_3$  unless stated otherwise, all mass spectra on a Qtof micro YA 263 instrument and elemental analysis on a Perkin Elmer 240c elemental analyzer. Light petroleum refers to the fraction with 60-80 °C. All chemicals used were of commercial grade and were used as such.

## 2. General procedure for the synthesis of dichromeno[2,3-b; 3',2'-e]pyridine-12,14-dione **6a-f**:

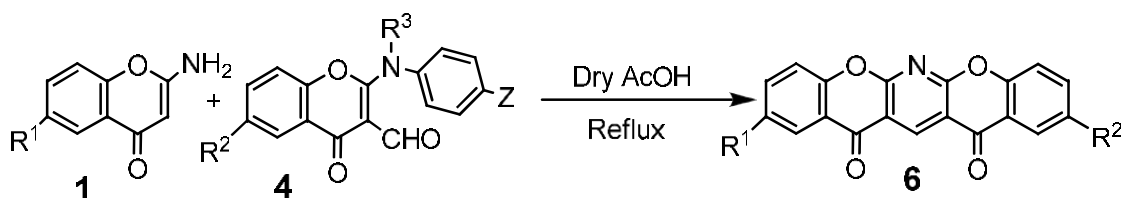

A mixture of **1** (0.25 mmol) and **4** (0.25 mmol) was dissolved in acetic acid (5 mL) in a 10 mL round-bottom flask and the resultant solution was heated under reflux in an oil bath for 5 h. The solvent from the reaction mixture was removed under reduced pressure and ice-water (10 g) was added to the concentrate. The deposited solid was filtered out, washed with water, dried in air and crystallized from acetic acid to get white solid **6a-f**.

## 3. Analytical data of Compounds **6a-f**

**6a**: Dichromeno[2,3-b; 3',2'-e]pyridine-12,14-dione

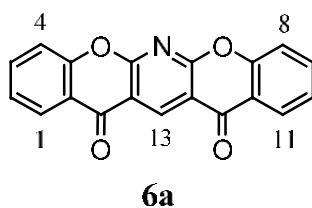

White solid, yield: (55 mg, 70%); m.p. >290 °C (lit.<sup>17</sup> 303 °C);  $\nu_{\text{max}}(\text{KBr})$  3080, 1670, 1602, 1399  $\text{cm}^{-1}$ ;  $\delta_{\text{H}}(\text{CDCl}_3)$  9.73 (1H, s, H-13), 8.38 (2H, dd,  $J = 8.0, 1.2$  Hz, H-1 and H-11), 7.88-7.84 (2H, m, H-3 and H-9), 7.67 (2H, br d,  $J = 8.4$  Hz, H-4 and H-8), 7.55-7.51 (2H, m, H-2 and H-10);  $\delta_{\text{C}}(\text{DMSO-d}_6)$  175.9, 161.5, 155.1, 138.8, 136.6, 126.3, 125.8, 121.1, 118.7, 115.0; HRMS(ESI): Calculated for  $\text{C}_{19}\text{H}_9\text{NO}_4\text{Na}$  338.0429, found 338.0437.

**6b:** 2-Methyldichromeno[2,3-b; 3',2'-e]pyridine-12,14-dione

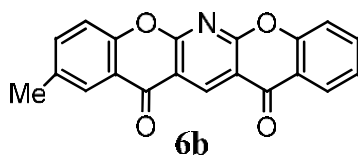

White solid, yield: (55 mg, 67%); m.p. >300 °C; [Found: C, 73.02; H, 3.32; N, 4.21. C<sub>20</sub>H<sub>11</sub>NO<sub>4</sub> requires C, 72.95; H, 3.37; N, 4.25%];  $\nu_{\max}$ (KBr) 3090, 1666, 1606, 1463, 1400 cm<sup>-1</sup>;  $\delta_{\text{H}}$  (CDCl<sub>3</sub>) 9.70 (1H, s, H-13), 8.35 (1H, dd,  $J$  = 8.0, 1.6 Hz, H-11), 8.14 (1H, br s, H-1), 7.86-7.81 (1H, m, H-9), 7.66-7.63 (2H, m, H-3 and H-8), 7.54 (1H, d,  $J$  = 8.8 Hz, H-4), 7.52-7.48 (1H, m, H-10), 2.51 (3H, s, Me);  $\delta_{\text{C}}$  (CDCl<sub>3</sub>) 176.2, 176.1, 161.9, 161.8, 155.4, 153.6, 141.2, 137.2, 136.1, 135.7, 127.0, 126.4, 125.6, 121.5, 121.1, 118.5, 118.3, 115.2, 115.0, 20.9; MS:  $m/z$  330 (M+H<sup>+</sup>), 352 (M+Na<sup>+</sup>).

**6c:** 2,10-Dimethyldichromeno[2,3-b; 3',2'-e]pyridine-12,14-dione

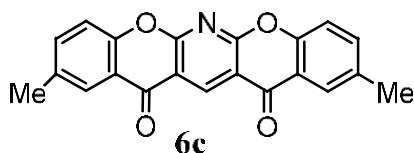

White solid, yield: (50 mg, 58%); m.p. >300 °C; [Found: C, 73.38; H, 3.79; N, 4.04. C<sub>21</sub>H<sub>13</sub>NO<sub>4</sub> requires C, 73.46; H, 3.82; N, 4.08%];  $\nu_{\max}$ (KBr) 3040, 1670, 1616, 1599, 1489, 1396 cm<sup>-1</sup>;  $\delta_{\text{H}}$  (CDCl<sub>3</sub>) 9.70 (1H, s, H-13), 8.13 (2H, br s, H-1 and H-11), 7.63 (2H, dd,  $J$  = 8.4, 1.6 Hz, H-3 and H-9), 7.53 (2H, d,  $J$  = 8.4 Hz, H-4 and H-8), 2.51 (6H, s, Me-2 and Me-10);  $\delta_{\text{C}}$  (CDCl<sub>3</sub>) 176.3, 161.8, 153.6, 141.2, 137.2, 135.6, 126.4, 121.2, 118.3, 115.0, 20.9; MS:  $m/z$  344 (M+H<sup>+</sup>), 366 (M+Na<sup>+</sup>).

**6d:** 2-Chloro-10-Methyldichromeno[2,3-b; 3',2'-e]pyridine-12,14-dione

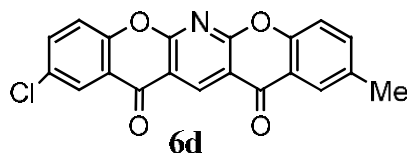

White solid, yield: (65 mg, 72%); m.p. >300 °C; [Found: C, 65.98; H, 2.73; N, 3.82. C<sub>21</sub>H<sub>17</sub>NO<sub>5</sub> requires C, 66.04; H, 2.77; N, 3.85%];  $\nu_{\max}$ (KBr) 3050, 1670, 1597, 1425, 1398 cm<sup>-1</sup>;  $\delta_{\text{H}}$  (CDCl<sub>3</sub>) 9.70 (1H, s, H-13), 8.32 (1H, d,  $J$  = 2.4 Hz, H-1), 8.15 (1H, br s, H-11), 7.78 (1H, dd,  $J$  = 8.8, 2.4 Hz, H-3), 7.66 (1H, br d,  $J$  = 8.4 Hz, H-9), 7.62 (1H, d,  $J$  = 8.8 Hz,

H-4), 7.55 (1H, d,  $J = 8.4$  Hz, H-8), 2.53 (3H, s, Me); MS:  $m/z$  364 ( $M+H^+$ ), 366 ( $M+2+H^+$ ), 386 ( $M+Na^+$ ), 388 ( $M+2+Na^+$ ).

**6e:** 2-Bromodichromeno[2,3-b; 3',2'-e]pyridine-12,14-dione

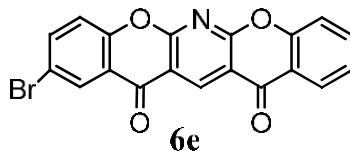

White solid, yield: (55 mg, 56%); m.p.  $>280$  °C; [Found: C, 57.80; H, 2.02; N, 3.51.  $C_{19}H_8BrNO_4$  requires C, 57.89; H, 2.05; N, 3.55%];  $\nu_{max}(KBr)$  3030, 1670, 1600, 1552, 1404  $cm^{-1}$ ;  $\delta_H$  ( $CDCl_3$ ) 9.72 (1H, s, H-13), 8.49 (1H, d,  $J = 2.4$  Hz, H-1), 8.38 (1H, dd,  $J = 8.0, 1.6$  Hz, H-11), 7.93 (1H, dd,  $J = 8.8, 2.4$  Hz, H-3), 7.89-7.85 (1H, m, H-9), 7.67 (1H, br d,  $J = 8.4$  Hz, H-8), 7.57 (1H, d,  $J = 8.8$  Hz, H-4), 7.56-7.52 (1H, m, H-10), MS:  $m/z$  394 ( $M+H^+$ ), 396 ( $M+2+H^+$ ), 416 ( $M+Na^+$ ), 418 ( $M+2+Na^+$ ).

**6f:** 2-Bromo-10-Methyldichromeno[2,3-b; 3',2'-e]pyridine-12,14-dione

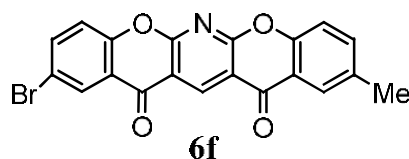

White solid, yield: (60 mg, 59%); m.p.  $>280$  °C; [Found: C, 55.79; H, 2.43; N, 3.39.  $C_{20}H_{10}BrNO_4$  requires C, 55.85; H, 2.47; N, 3.43%];  $\nu_{max}(KBr)$  3065, 1676, 1602, 1552, 1398  $cm^{-1}$ ;  $\delta_H$  ( $CDCl_3$ ) 9.71 (1H, s, H-13), 8.49 (1H, d,  $J = 2.4$  Hz, H-1), 8.15 (1H, d,  $J = 1.5$  Hz, H-11), 7.93 (1H, dd,  $J = 8.8, 2.4$  Hz, H-3), 7.66 (1H, dd,  $J = 8.4, 1.5$  Hz, H-9), 7.57 (1H, d,  $J = 8.8$  Hz, H-4), 7.56 (1H, d,  $J = 8.4$  Hz, H-8), 2.53 (3H, s, Me); MS:  $m/z$  408 ( $M+H^+$ ), 410 ( $M+2+H^+$ ), 430 ( $M+Na^+$ ), 432 ( $M+2+Na^+$ ).

**4.** Copies of  $^1H$  NMR and  $^{13}C$  NMR spectra of compound **6a-6f**

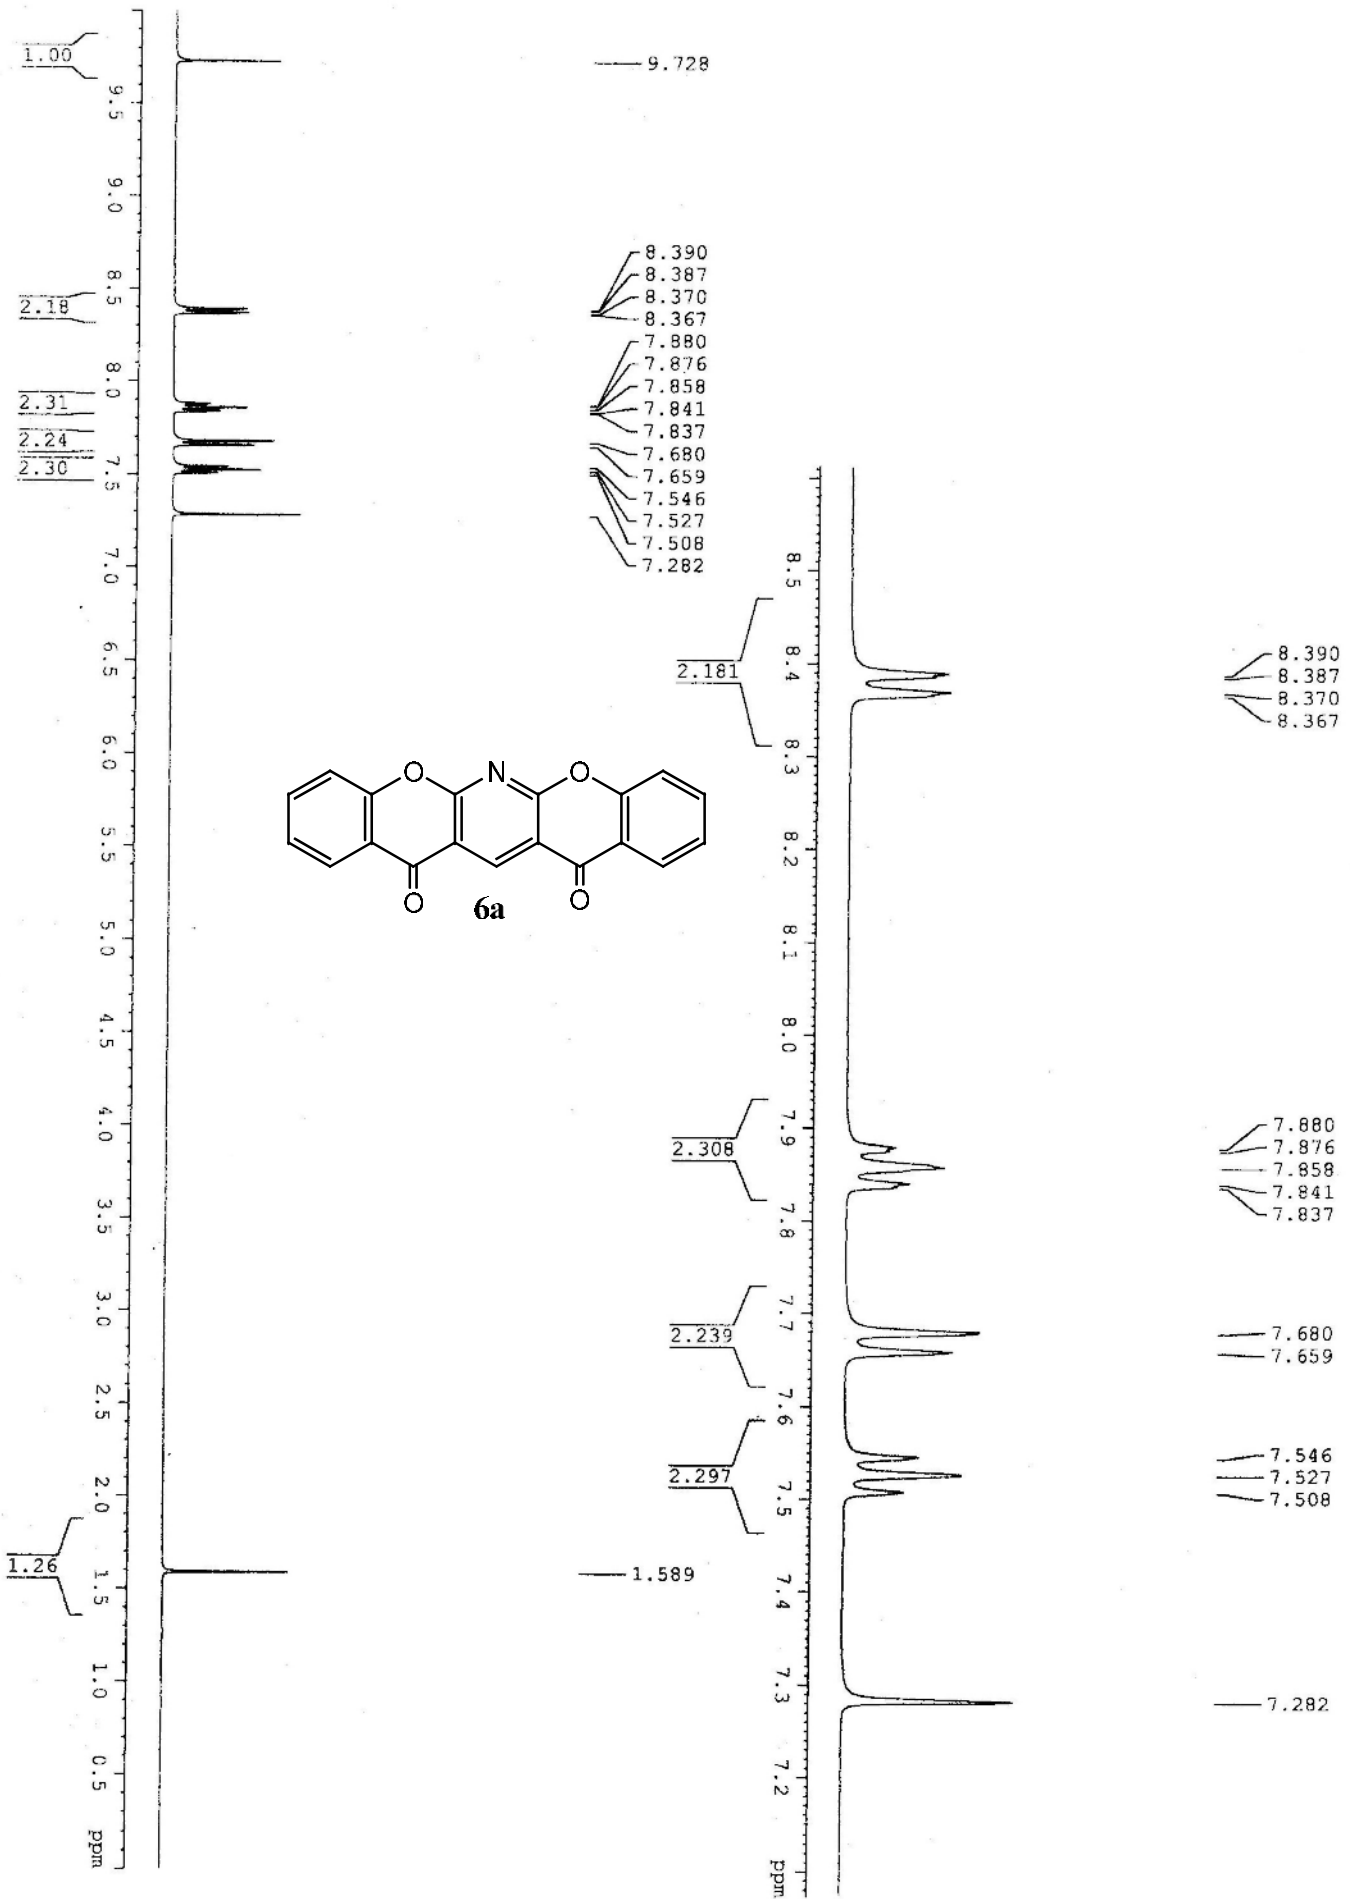

210 200 190 180 170 160 150 140 130 120 110 100 90 80 70 60 50 40 30 20 10 ppm

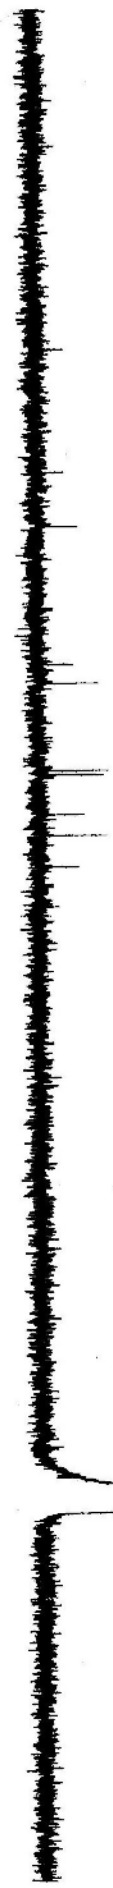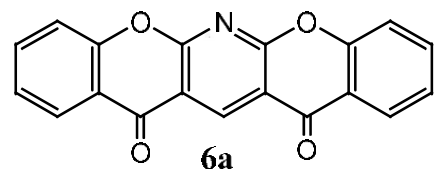

- 175.92
- 161.50
- 155.05
- 138.81
- 136.62
- 126.26
- 125.79
- 121.10
- 118.65
- 115.00
- 42.86
- 40.34
- 40.06
- 39.78
- 39.51
- 39.23
- 38.95
- 38.67

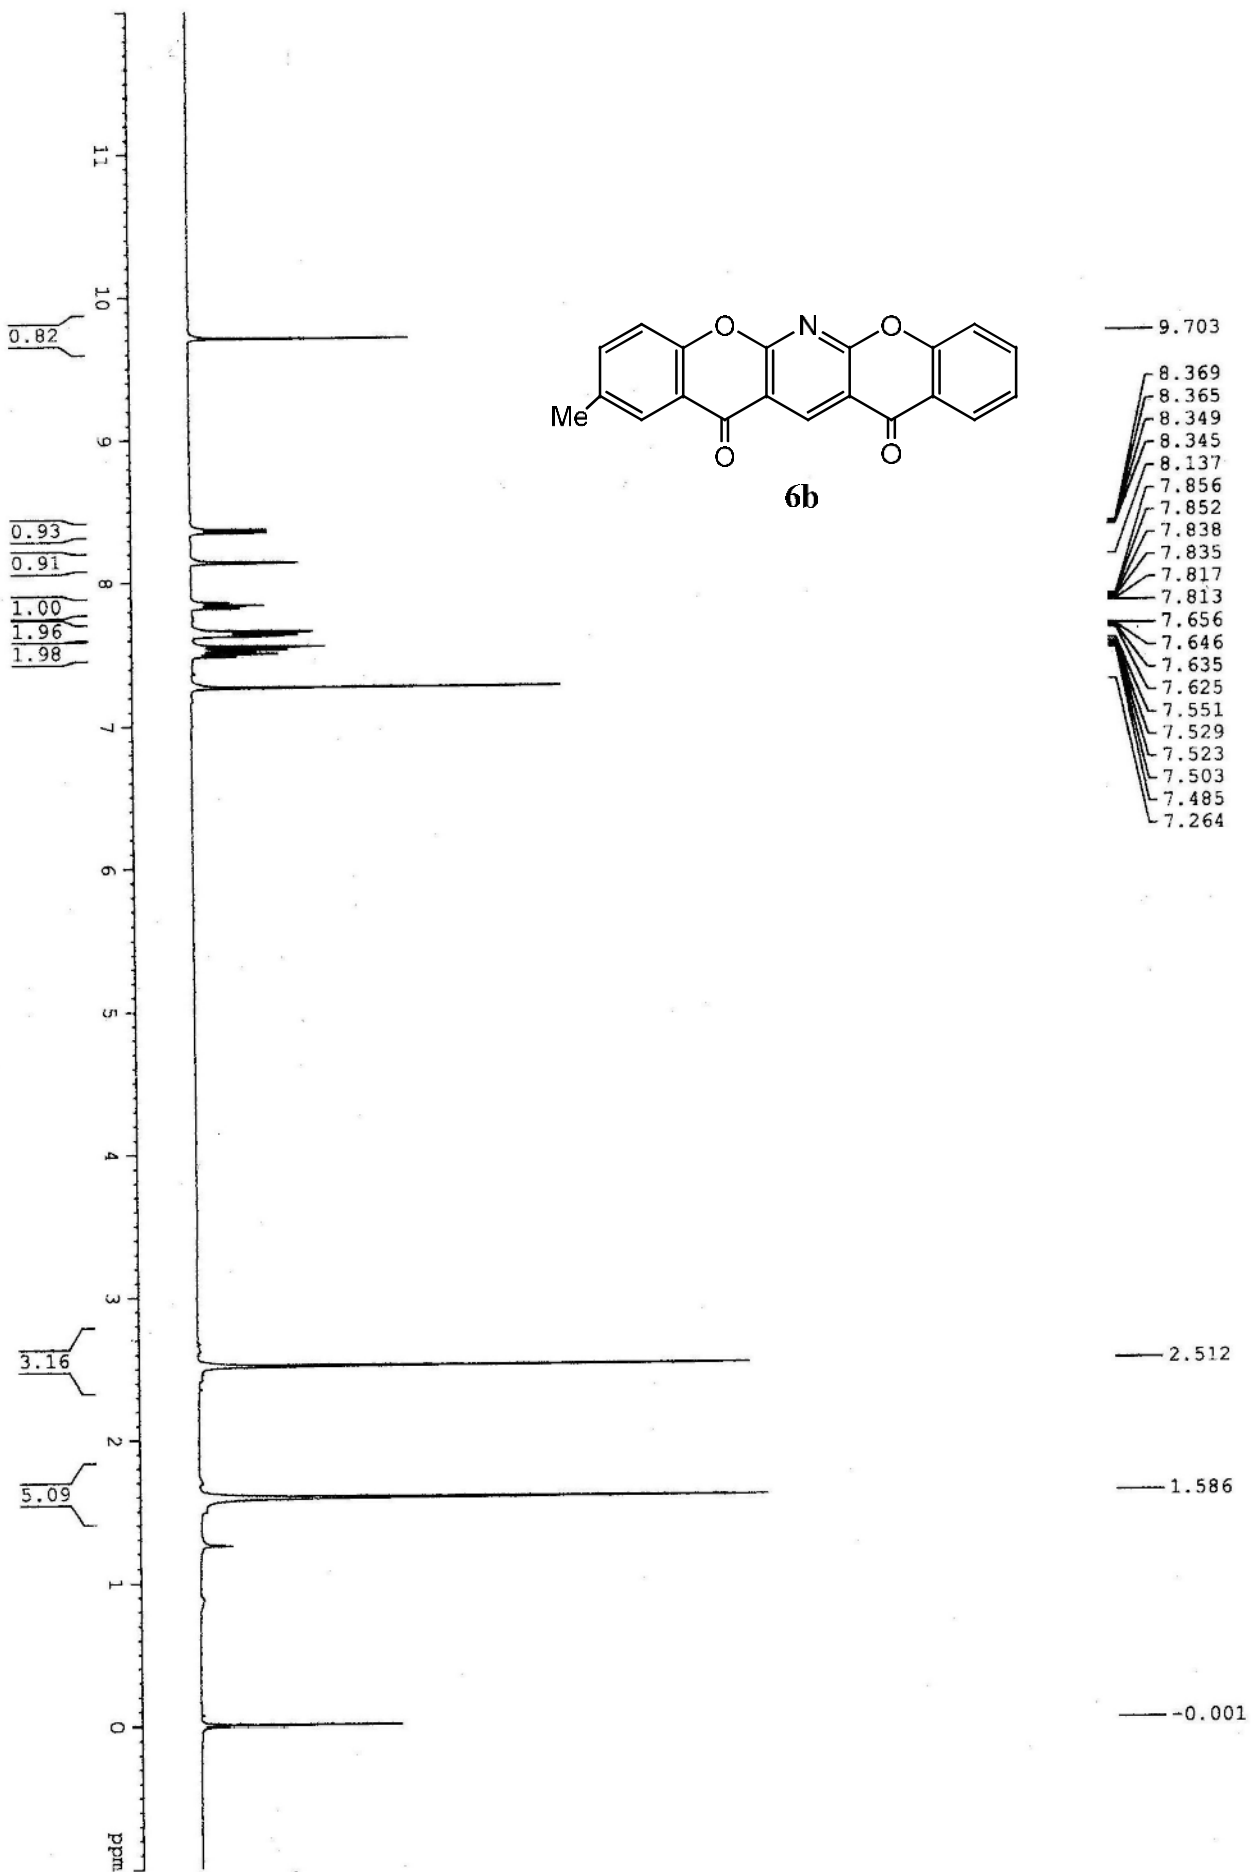

190  
180  
170  
160  
150  
140  
130  
120  
110  
100  
90  
80  
70  
60  
50  
40  
30  
20  
10  
ppm

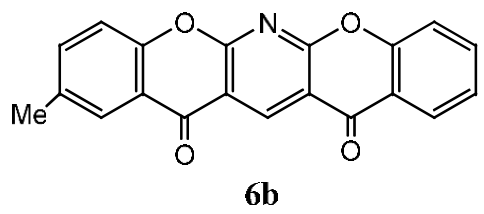

- 176.21
- 176.15
- 161.85
- 161.77
- 155.36
- 153.55
- 141.23
- 137.23
- 136.05
- 135.68
- 127.02
- 126.42
- 125.55
- 121.52
- 121.13
- 118.52
- 118.28
- 115.16
- 115.04
- 77.34
- 77.23
- 77.02
- 76.70

20.90



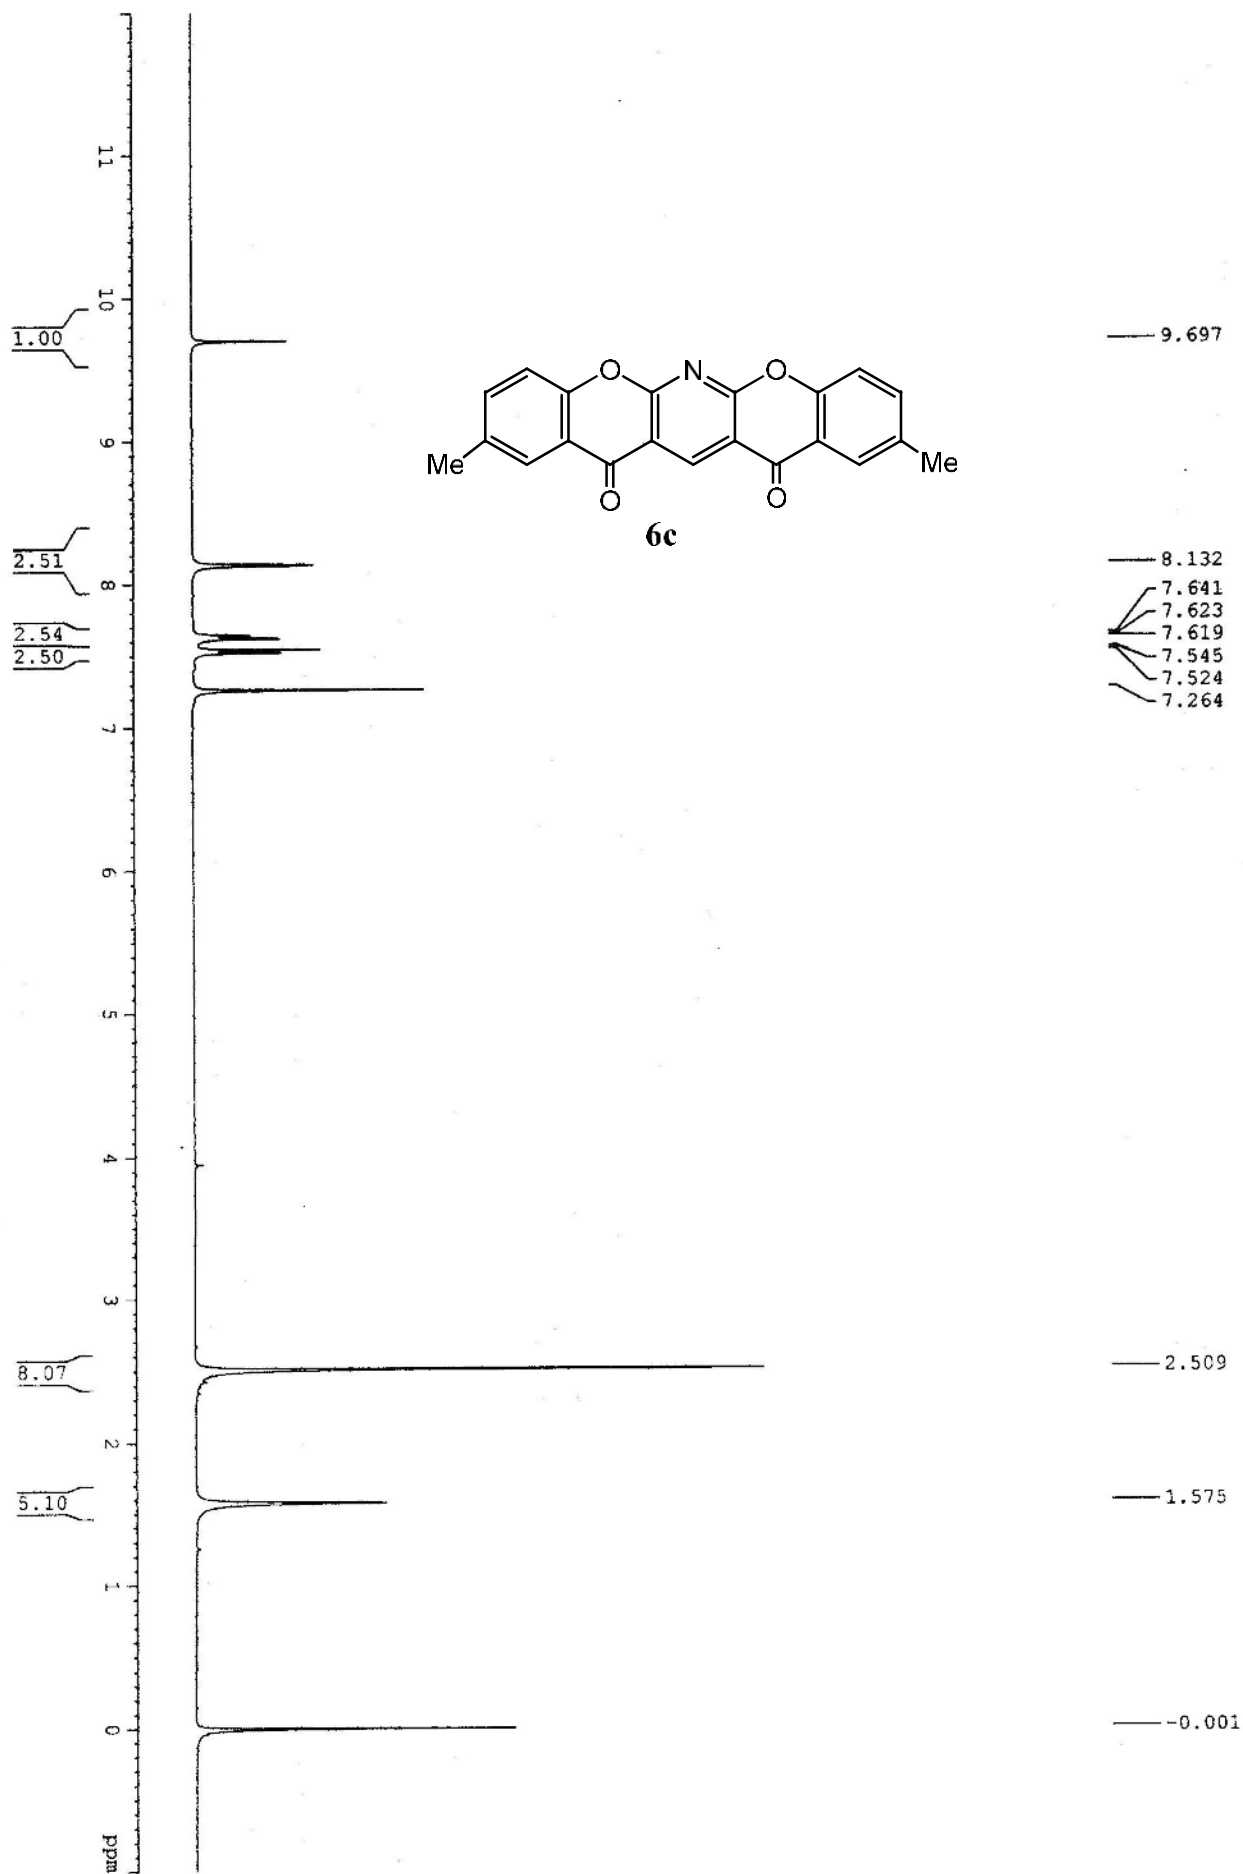

190  
180  
170  
160  
150  
140  
130  
120  
110  
100  
90  
80  
70  
60  
50  
40  
30  
20  
10  
ppm

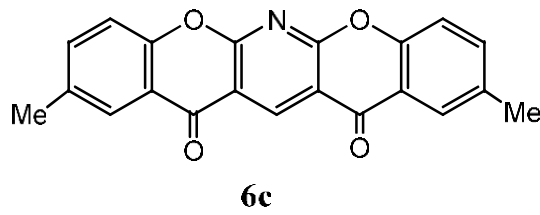

- 176.27
- 161.79
- 153.58
- 141.24
- 137.20
- 135.63
- 126.42
- 121.15
- 118.28
- 115.02
- 77.33
- 77.02
- 76.70
- 20.90

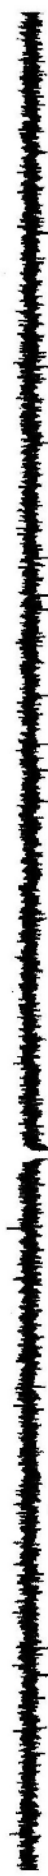

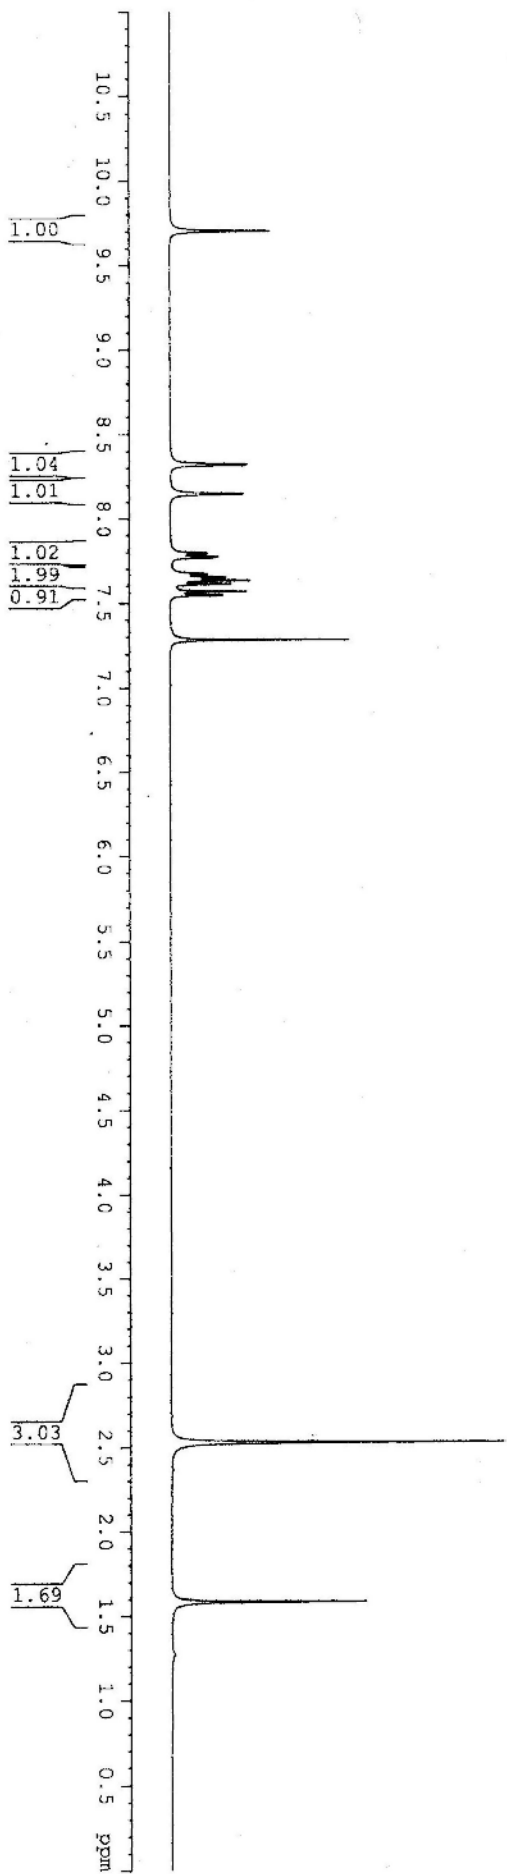

— 9.704

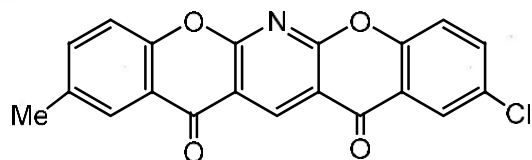

**6d**

8.325  
8.319  
8.149  
7.798  
7.792  
7.775  
7.770  
7.671  
7.651  
7.634  
7.612  
7.567  
7.546  
7.283

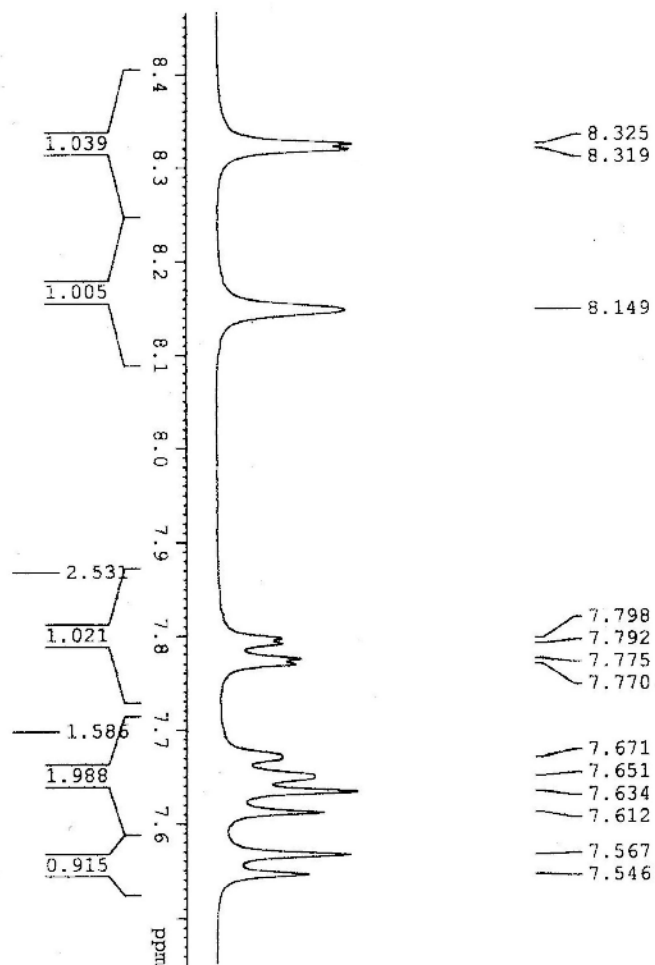

8.325  
8.319

— 8.149

7.798  
7.792  
7.775  
7.770

7.671  
7.651  
7.634  
7.612  
7.567  
7.546

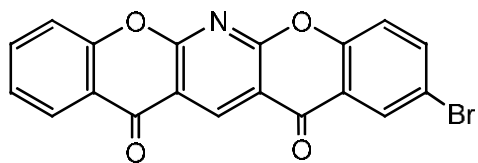

6e

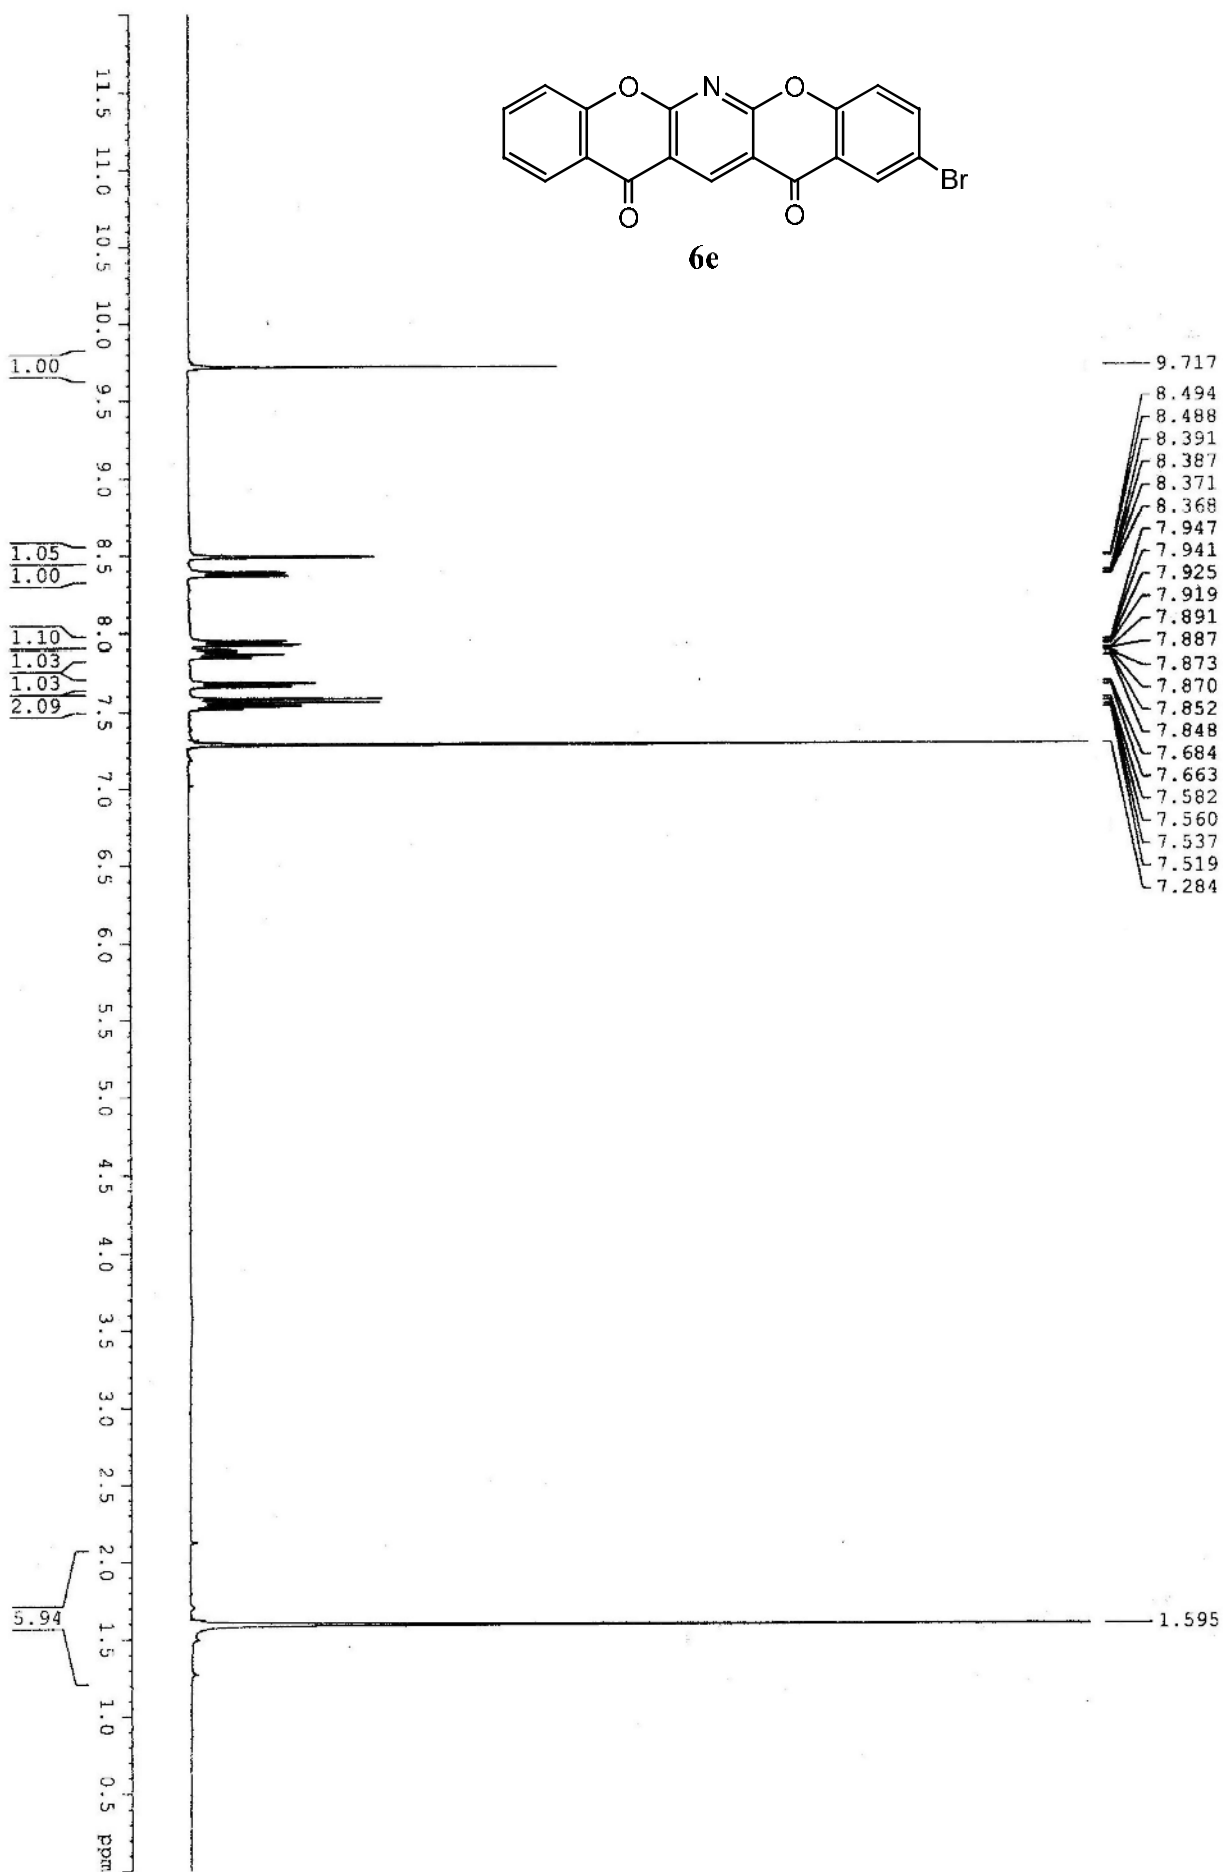

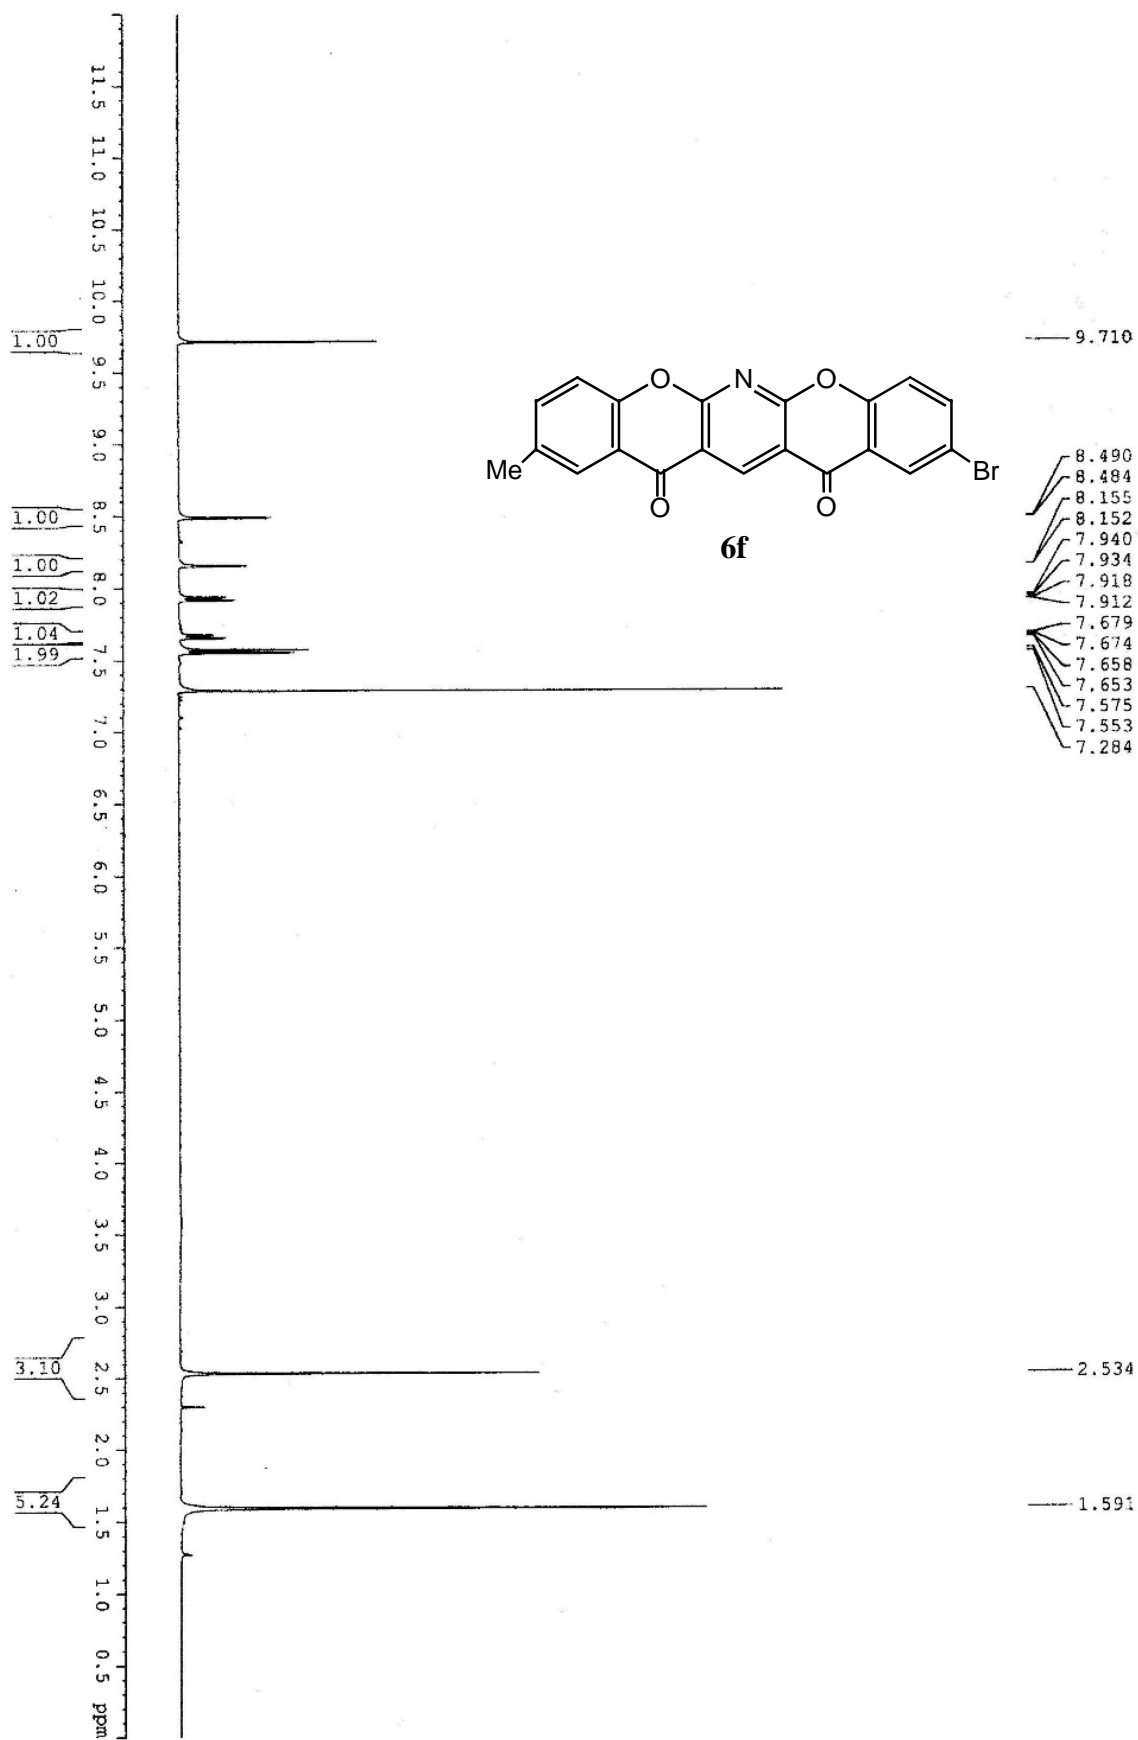

### 5. Excitation spectra of compounds 6a, 6c, 6d and 6f

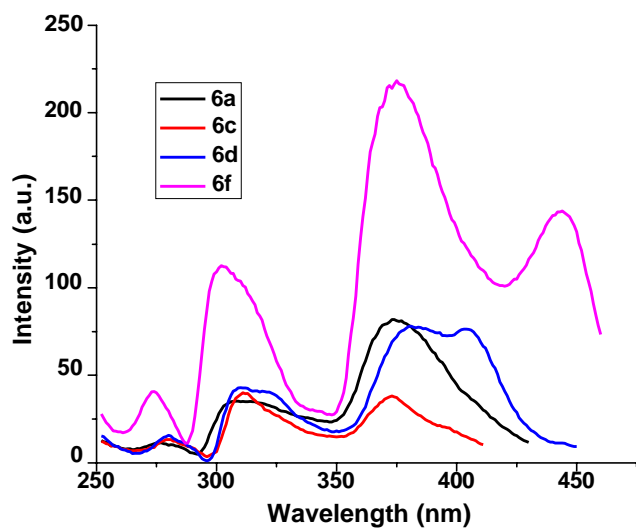

Fig. A. Excitation spectra of compounds 6a-f in THF

### 6. Absorption spectra of compound 6f in three different solvents

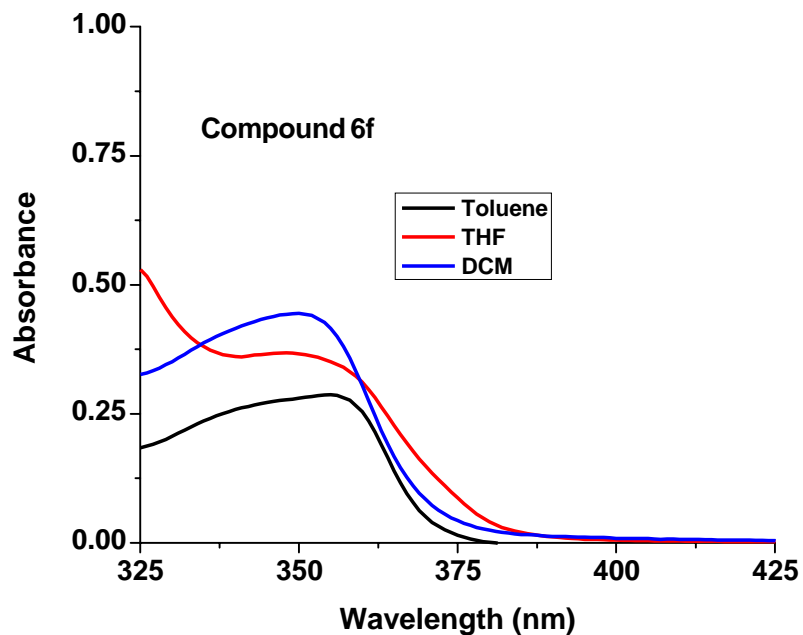

Fig. B. Absorption spectrum of compound 6f in three different solvents

7. Emission spectra of compound **6f** in three different solvents.

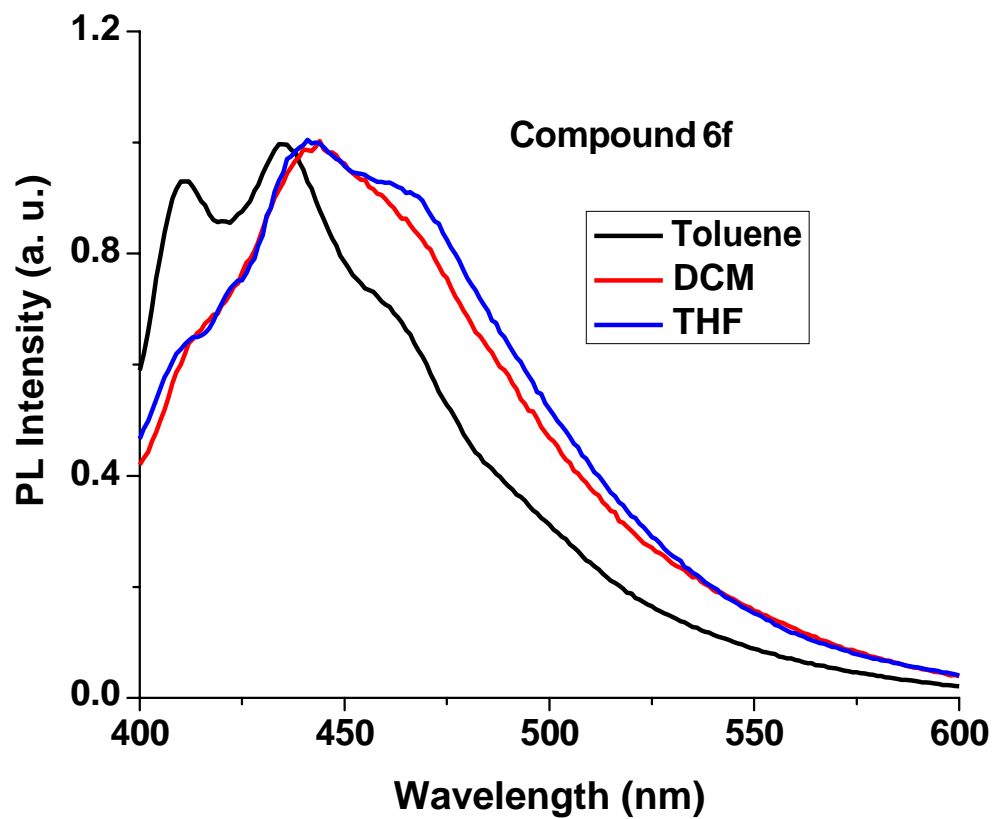

**Fig. C.** Normalized emission spectra of compound **6f** in three different solvents.
